# Supplementary material
Source: PubMed Central journal article supplement (PMC2747041)
Supplement: NIHMS135380-supplement-1.pdf [file NIHMS135380-supplement-1.pdf]

## **Supplementary Figure, Tables and Methods**

Supplementary Methods-details of specific Materials and Methods

Supplementary Table S1- Sequenom MassARRAY assay designs of association and AIM SNPs

Supplementary Figure S1-STRUCTURE analysis of HapMap, ECOG breast cancer and CGEMS controls.

Admixture analysis of ECOG breast cancer cases, CGEMS controls and HapMap reference samples.

Supplementary Table S2-HapMap SNPs mapping to miRNA sites in dysregulated genes

Supplementary Table S3- Original CGEMS Association Findings for SNPs Tested
