# Supplementary material
Source: PubMed Central journal article supplement (PMC2747041)
Supplement: NIHMS135380-supplement-2.pdf [file NIHMS135380-supplement-2.pdf]

## **SUPPLEMENTARY METHODS**

### **Description of Study Populations and Genotyping**

Our ascertainment criteria for cases included a living affected sister with disease willing to participate in the study. Among families that provided information, 96% reported Caucasian ancestry, 2% Ashkenazi, ~1% African American, 1.7% Native American, and <1% other. Our sib pairs consisted of 8 sets of self-reported monozygotic twins, (1.7%) and 6 pairs (1.3%) having non-shared paternity based upon allele sharing at the X-linked androgen receptor (*AR*) microsatellite (het=0.89) [1]. Non-shared paternity for a given sib pair was defined as an index case and her sibling sharing 0 alleles at *AR*. Index cases from these pairs were nonetheless retained for association testing. SNP assays were designed with assay Design 3.1 software into 3 separate assays (Supplementary Table S2). After a 6ml multiplex PCR amplification the resulting products were treated with Shrimp Alkaline Phosphatase (SAP) and single-base primer extension chemistry was conducted with mass modified dideoxyribonucleotides (iPlex Gold Chemistry). Extension products were processed with SpectroCLEAN resin, and spotted onto SpectroCHIPS and analyzed via MALDI-TOF mass spectrometry [2]. Automated genotype calls were made with SpectroTYPER v3.4 software. To reduce the likelihood of scoring errors due to genotyping platform disparities we genotyped both our AIM and association SNPs in a reference panel of HapMap samples and observed a concordance rate of 99.36% (2161/2175). Genotype data for all association SNPs were tested for deviations from Hardy-Weinberg proportions in cases and we observed no deviation for the 3 SNPs tested ( $p < 0.001$ ). Five AIMs showed deviations from Hardy-Weinberg proportions but were nonetheless retained for analysis with STRUCTURE 2.2 for population admixture.

### **Population Structure Analysis and Association Testing**

We genotyped 59 AIMs utilizing Sequenom iPLEX mass spectrometry technology. We downloaded equivalent genotypes for HapMap self-identified reference samples and for controls

(n=1,142) and cases (1,145) from the CGEMS database. After genotyping our ECOG BrCa cases we retained 455 individuals for STRUCTURE analysis. Five SNPs (rs1040045, rs6451722, rs3907047, rs4746136 and rs798443) exhibited prior association to disease in the CGEMS dataset ( $p < 0.006$  to  $p < 0.037$ ) and were omitted from STRUCTURE analysis [3]. STRUCTURE analyses were run without any prior population assignment using 50,000 iterations with 10,000 burn-in cycles under the admixture model with initial  $q = 1.0$  without specifying population membership. We utilized the infer  $q$  option and estimated a separate  $q$  for each population under the F model ( $q$  is defined as the Dirichlet parameter for degree of admixture). When we included 105 AMI (AmerInd) individuals as described by Kosoy, et. al [4] and increased the defined population cluster parameter to  $k=4$  populations we observed no appreciable difference in the clustering of our ECOG cases or CGEMS controls to CEU HapMap reference samples (data not shown). More importantly we were also able to identify the most likely genetic ancestry of our cases and the CGEMS controls for which we lacked self-reported ethnicity. Association testing for imputed rs1434536 genotypes were performed by the method of Marchini [5]. Briefly, rs1434536 genotypes from CGEMS controls were imputed with IMPUTE from HapMap CEU SNPs from chromosome 4 region 96,289 – 96,296 kb, which surround rs1434536. IMPUTE uses a hidden Markov model and known HapMap haplotypes to impute missing data. Association testing with SNPTTEST includes imputation uncertainty in the subsequent association test by modeling the observed data likelihood using the full data likelihood integrated over missing data.

### **Cloning, Luciferase Assays, and qRT-PCR of *BMPRI1B***

MB-MDA-231 and MCF-7 cell lines were obtained through American Type Culture Collection (Manassas, VA). All tissue culture reagents were purchased from Invitrogen (Carlsbad, CA) and Sigma (St. Louis, MO). PCR primers for *BMPRI1B* were (forward primer: 5'-CCGCTCGAGGTCCCAGGACATTAAGTCTG-3', Reverse primer: 5'-TTTTCCTTTTGCGGCCGCGCATCA

TATCTTGAACAAGTT-3') containing *Xho I* and *Not I* restriction sites respectively for directional cloning into the MCS site Psi-CHECK-2.2. Twenty-five nanograms of genomic DNA were PCR amplified (95°C, 5min, 95°C 30sec, 55°C, 30sec, 72°C, 40sec, for 35 cycles, 72°C 3 min final extension) with 1 µl of Taq (5U/µl Roche), 1X Taq Buffer, 1 µM primers, and 200 µM dNTPs. PCR products (~0.28kb) were restricted with the aforementioned enzymes, purified via gel electrophoresis and cloned into PsiCheck-2.2. Genotypes for MCF-7 and MDA-MB-231 cell lines at rs1434536 were determined by sequencing PCR products derived from 25ng genomic DNA isolated from cells grown in culture and the aforementioned primers.

MDA-MB-231 and MCF-7 cells seeded one day before, were transfected with plasmids bearing the T or C alleles in triplicates in 24-well plates at 80% confluency with a Lipofectamine 2000 (Invitrogen) complexed with a mixture of 25 ng psiCheck reporter plasmid and 75 ng stuffer DNA (pBlueScript) per well. miR125-b target site cleavage results in degradation of reporter mRNA, with a concomitant decrease in translated product, which can be detected by a luminescence-based assay system. Firefly luciferase expressed from psiCheck2.2 served as an internal normalization control.

### **Transfection of miR-125b Duplexes and qRT-PCR of *BMPRI1B***

Sequences for siRNA duplexes: siR 5'- GGACUAUAGCUAAGCAGAUUCAGat-3' and 3'- UUCCUGAUAUUCGAUUCGUCUAAGUCUA-5' (RNA nucleotides are shown in uppercase and DNA nucleotides shown in lower case) and has-miR-125b:hsa-miR-125b-1\* (targets C allele of rs1434536) duplex: 5'-UCCCUGAGACCCUAACUUCUGA-3' and 5'-ACGGGUUAGGCUCUUGGGAGCU-3'. These duplexes target positions chr4:96,270,043 and chr4:96,294,738 respectively in *BMPRI1B*. Cells were purified with RNA STAT-60 (IsoTex Diagnostics, Inc.) according to manufacturers directions. *BMPRI1B* specific primers 5'-CAACAAAATTCTTCCCAGGAACT-3' and 5'-TGGTTCACAGAGTGCAACAATA-3' were used to amplify cDNAs. Samples were treated with DNase I (Ambion, Turbo DNA-free) and control reactions omitting M-MLV were also included to rule out

genomic DNA contamination. SYBR green technology was utilized for transcript quantitation. *GAPDH* intron spanning primers (5'-CATTGACCTCAACTACATG-3' and 5'-TCTCCATGGTGGTGAAGAC-3') were utilized as normalization controls. PCR conditions were: 95°C for 5 min, followed by 40 cycles of 95°C, 15 sec, 55°C for 30sec, 72°C for 30sec.

## References

1. Haiman, C.A., et al., *The androgen receptor CAG repeat polymorphism and risk of breast cancer in the Nurses' Health Study*. *Cancer Res*, 2002. **62**(4): p. 1045-9.
2. Ragoussis, J., et al., *Matrix-assisted laser desorption/ionisation, time-of-flight mass spectrometry in genomics research*. *PLoS Genet*, 2006. **2**(7): p. e100.
3. Pritchard, J.K., M. Stephens, and P. Donnelly, *Inference of population structure using multilocus genotype data*. *Genetics*, 2000. **155**(2): p. 945-59.
4. Kosoy, R., et al., *Ancestry informative marker sets for determining continental origin and admixture proportions in common populations in America*. *Hum Mutat*, 2009. **30**(1): p. 69-78.
5. Marchini, J., et al., *A new multipoint method for genome-wide association studies by imputation of genotypes*. *Nat Genet*, 2007. **39**(7): p. 906-13.

Supplementary Table S1 Sequenom MassARRAY assay designs of association and AIM SNPs

| WELL*   | SNP_ID†                | 2nd-PCR‡              | 1st-PCR               | UP_SEQ§                       | UEP_<br>DIR | EXT1_<br>CALL | EXT2_<br>CALL |
|---------|------------------------|-----------------------|-----------------------|-------------------------------|-------------|---------------|---------------|
| Assay_1 | rs9522149              | AGAAAGGAGAGAAACACCG   | TCAGCAACTTCTAGTCTCTCG | GGTCCTTGCAGCTCC               | F           | C             | T             |
| Assay_1 | rs11652805             | CCCTCAAAGTTTGGTGCATC  | CTCTTCTGTCCTGAGATG    | CTTTCTCTCTCCAGC               | F           | C             | T             |
| Assay_1 | rs9530435              | ATCAGGCACATGGTAAGCAC  | CTCCATCTGGTACATATGTG  | gAAGCACTCAGCGAAG              | R           | T             | C             |
| Assay_1 | rs2416791              | TATAGCATCTACCATCAGCC  | ATACTGCCCCATAAGGAGTG  | aACCATCAGCCCAATTC             | F           | A             | G             |
| Assay_1 | rs9855638 <sup>2</sup> | GGTTAGTTTTGGTGAAGTCC  | GACCTTGGCTTTTACCATAG  | TTGTTGCTCATGCATT              | R           | G             | C             |
| Assay_1 | rs10108270             | AACAGCATCTGAGACGCTTC  | AGTGACCTGGACACAATTC   | TCAGGTGAGGACTTAGC             | R           | C             | A             |
| Assay_1 | rs4666200              | CCCTATCCTTGGTGATTTGG  | CAGTACAATTGGCAAGCAC   | tACTTCAGAGCTATTGGC            | R           | G             | A             |
| Assay_1 | rs9319336              | ATGCAAGGTAAATGCACCCTC | TCTACCTGCAGGTAAGTGC   | ACCCTCTCCCTGCTCTAT            | F           | C             | T             |
| Assay_1 | rs3907047              | CAGAATCGGCATGATACCC   | GAAAGTCCAGGAAGTTCAGG  | ctTCAGCTCTGTATCTCC            | F           | C             | T             |
| Assay_1 | rs4908343              | CCAAACCCACAAAGCTTAAC  | AGGGAGAGAAGGTGAGTTAC  | AACCCCTGGGCTATGACAA           | F           | A             | G             |
| Assay_1 | rs1513181              | CAGATTTCCATAGCCTCTC   | AGGTGAGACAGTTGGACAAG  | GTTGAGCTTGAAAAATTCCC          | F           | C             | T             |
| Assay_1 | rs3737576              | GGTCTGGTCTTGTCAAAG    | AGGAGGAAGAGCATAGTGAG  | AGATTGTGAAAGACTGAAAT          | F           | A             | G             |
| Assay_1 | rs1040045              | GAGAGAAAGGGACACAGAAC  | CCTCACCCATCTACTCTTG   | tagtATGGGGATTGGGGTAA          | F           | C             | T             |
| Assay_1 | rs7803075              | AATCCACATGAAGTGCCTC   | ATCTATCACGTGGACCTTG   | cctCGCTCCTGGATCTTTAC          | F           | A             | G             |
| Assay_1 | rs731257               | GTTGAGGTATCAGTGGAATC  | TCCATCTAATTGGAAGTGC   | TGGAATCACAAATTGTATCTC         | R           | G             | A             |
| Assay_1 | rs7997709              | TAAGTGTGTTTCCCTCAGTG  | ATGTGGATGAGTTGCTCAAC  | agaTTTCCCTCAGTGGTTAGC         | R           | T             | C             |
| Assay_1 | rs4918842              | ATTGCTCAGAAATGCTGTGG  | TTAATCGGATGCTGAGCCTG  | AAATGCTGTGGATATTGACTTA        | F           | C             | T             |
| Assay_1 | rs10496971             | AATGTCACCTTTAGGCAGAG  | GGAAACATTTGAGTCTCAAG  | ggggaTTTAGGCAGAGGCAATT        | F           | G             | T             |
| Assay_1 | rs12629908             | CCAATCTCTTACTCTCTC    | TCCATCATCCAGGAGCTTAG  | CTTACATCTCCTGAAAAGAAAT        | R           | G             | A             |
| Assay_1 | rs10007810             | TCTTCTCTGTAGACAGGGC   | CGTGGCACATGCCATGTTTT  | acttgAGACAGGGCCCTCTATCT       | F           | A             | G             |
| Assay_1 | rs772262               | CACITTTGACTTAAGACGGG  | TTCAATACCTCTGGCCTCTC  | cGACGGGTTTTTATCAGGACATA       | F           | A             | G             |
| Assay_1 | rs4746136              | GGTATGTCCTAGATGACAAG  | AGCACATACTGCAAGCACG   | TGGACAGATAAACTTATTTGTGTA      | R           | G             | A             |
| Assay_1 | rs2125345              | AGTGTATGGTCTTGTGG     | TAACGTGAGTCAAGTGTAG   | ggtagGGTTTTCTTGTGGGATTCT      | R           | G             | A             |
| Assay_1 | rs6451722              | CTCTGTAAGCAGCTATTGCC  | TCTGCTCCTAAGGAAGATGC  | tCAGCTATTGCCATTTTTCTCAT       | F           | A             | G             |
| Assay_1 | rs7554936              | AACCAGGGACTGCATACAAC  | CATCCTAGTGAATGCCATCC  | ccctTAAAGTCATAGGTGAACCTTC     | R           | T             | C             |
| Assay_1 | rs7657799              | ACAAGGCCAAATGCTGAAG   | AGCCAATTGATTCTCTTTC   | cccTGATCTACCTTGCAGGTATAATG    | F           | G             | T             |
| Assay_1 | rs260690               | CTCATAGTTGCTATGAACAG  | TCTGTGGCCAACTGAAAAGG  | ggcGTTGCTATGAACAGTTTAACTG     | R           | C             | A             |
| Assay_1 | rs4891825              | GTGTAACAATCTCAATCCCC  | CTAGGGTTGGTAAAGGATGG  | atcgCAATCCCTTAATGTTTTCTATC    | F           | A             | G             |
| Assay_1 | rs6104567              | ACAAGGCCAGTATGATTG    | GCTTGGCTTTAATATGGAGG  | CAGTATGATTGATACATATCTAATTA    | F           | G             | T             |
| Assay_1 | rs1471939              | TACCACCATCTTAAACAGC   | TGTTAACTCCAGAACAAGTG  | cctCATCTTAAACAGCTATAGATATAGT  | R           | T             | C             |
| Assay_2 | rs1407434              | CCCATATCATCTCCACTCAG  | TGAACCTAAAAGCAAAGGG   | GCCCTCAGTCCCTCT               | R           | T             | C             |
| Assay_2 | rs2504853              | CATCCTGAAGGTGATGGAAG  | GAAATTCACAGGCTCCAGAC  | ATGGAAGCCTTGCAT               | F           | C             | T             |
| Assay_2 | rs870347               | ACCTTTTTCAGCCTGACTCC  | ATCATGCGACATCCAGGTAG  | TGCTAAGTCCCTCACT              | F           | G             | T             |
| Assay_2 | rs4821004              | CTTGCAAGTGTGAAGAGCAG  | CAAGGGCCGATGATATTTGC  | GGGGAGGGAGCAAGCC              | F           | C             | T             |
| Assay_2 | rs9845457              | TTGCACTAGATCCGGGAAGC  | CTTACTCCATCCAGTACAG   | ggCCGGAAGCCGCTGC              | R           | G             | A             |
| Assay_2 | rs2946788              | TATCTACTCTGGCCAAACTC  | CATTCCAATGAGCTTAAGCC  | CCAACTCAATAGCCACA             | R           | G             | T             |
| Assay_2 | rs8113143              | TGTGGGTTCTTGTGTGTTG   | AAGTGAGAGGATGAGAGGAG  | GTTGGATAACACATCCCC            | R           | C             | A             |
| Assay_2 | rs2030763              | CTTCTTTTCTTACCAACTGC  | ATCCATCGGGATGGCTTAAAC | ATGAATAAGCTGAGCTTCT           | R           | G             | A             |
| Assay_2 | rs9809104              | AAAACACAGGACAGACAG    | TGACGTGGAGTGATTGGAG   | CAGGACAGTTATTGAGGAA           | F           | C             | T             |
| Assay_2 | rs798443               | GGTATTGCTAACATCTCCAG  | CTCAGTGCAGATGGGAAATG  | cAATTTCCACTAACAACGCA          | F           | A             | G             |
| Assay_2 | rs2397060              | AAAACATGTTTAGGGTTTG   | CCTTCATTACAACCCAGGTA  | ATGTTTAGGGTTTGAAGAAT          | F           | C             | T             |
| Assay_2 | rs4984913              | GGAAGTGGTCTCTTCTTAC   | ACCCGGAACCTTCTGGTGT   | aagaaCAGGAAGTGGGCACA          | F           | A             | G             |
| Assay_2 | rs2627037              | AGCGCCGAACCTCAATTATC  | GTGCCTTCTTTTCGGAATC   | TTGTCTGAATCTCCAGTTTAC         | R           | G             | A             |
| Assay_2 | rs3943253              | TGTGGCTTAGGAGTGACATC  | ATCCAGTGTAGAAAGAGCCG  | TGACATCGTAAATACCCTTGG         | R           | G             | A             |
| Assay_2 | rs13400937             | CTTACCACCCGTGAAATAAC  | CCAAAGTTTGTCCAAATCTG  | aaACATTTCAAGGAAGTTGAATT       | F           | G             | T             |
| Assay_2 | rs734873               | ACTGTCCTGTGCAAGAACC   | GATGTCTTGATGATTCTCTC  | gggaCCTAGGGCAAGAGAGTAA        | R           | T             | C             |
| Assay_2 | rs3745099              | CAGTTACTTTTCTCCCTGC   | AAGTAGAAGGTGAGTGGGG   | ggccGCTATTTTCTCGGCACCTT       | R           | G             | A             |
| Assay_2 | rs1040404              | AACTCAAGTGTCTCTGAGC   | CAGCTGAGCATTTTGTAGTG  | tgGTGATACTATTTTCTACCACA       | F           | C             | T             |
| Assay_2 | rs10236187             | AGAAGGAACGCGCAGACAAAG | CCTAGTGGGAGTAAAAGTG   | gagtgCAGACAAAGCCTCACATTA      | F           | C             | A             |
| Assay_2 | rs1325502              | TCTGGATAAACATTCTGGCG  | CATCACCCAGAATGGCAAAC  | gagtgCTGGCGTTGCTGCATGTTT      | R           | G             | A             |
| Assay_2 | rs10513300             | TACCTCTGCAATGCCCTATC  | AAGAGCACATACTCCATACC  | CCCTATCTTATTATCATATGAGTTC     | F           | C             | T             |
| Assay_2 | rs12130799             | GTGTTACTCAATGGAGCTCT  | GGTCTGGGATATTGTTGGG   | gTCTCTATTGTATCTCCAATGTCT      | F           | A             | G             |
| Assay_2 | rs6422347              | TGAAGGCCGACTTCACGGA   | ATGTTGACCTCCCTCTCCC   | ggtcCGGAGCTGGTGACATTTTAAAC    | F           | C             | T             |
| Assay_2 | rs1408801              | GTGATAGTTTTACAGTTTCC  | ACATGCATGTGATTTGCAGG  | ggcaTTTTACAGTTTCTTAAACCATG    | R           | G             | A             |
| Assay_2 | rs4463276              | TCGGCTGTTTCTTTTTTTG   | ACAACAAGGAAAATGAGCCC  | tttgGTGGGTACACAGTAAGTGTATA    | R           | G             | A             |
| Assay_2 | rs4717865              | GTTCTAGATTGAGACCTGTC  | CATCGGAGAGGCAAATGAC   | ggggaCCTGCTGCTGCTACCCAGCCTC   | R           | G             | A             |
| Assay_2 | rs1760921              | ATACGCAAAAGTACTGCCAC  | TACTGGCCATATTCTCTCTC  | ccacaACTGCCACATCCGTCCACCTT    | F           | A             | G             |
| Assay_2 | rs6556352              | CAATGCATATGCTACTCTTCC | AGCTGCATATAAACCCAGAC  | ccTCCATAAAAATGAAATTCATTTAAAC  | R           | T             | C             |
| Assay_2 | rs7421394              | AGTTTAAAGAGTTTACAGG   | TTTTCCACGTGAACATACCC  | cctctGTTTGACAGGATAAATTTCTGAGA | R           | G             | A             |
| Assay_3 | rs1219648              | GACAAGCCATGGCCATCCTT  | TCTTCCATGGTACCGTTTTC  | GGCCATCCTTGAAGAG              | R           | G             | A             |
| Assay_3 | rs1970801              | CAGTAGGCCATAAATGTGGG  | CAAATGCTTTATGGGGAAG   | GACACCCATTTCTTACCT            | R           | C             | A             |
| Assay_3 | rs6831418              | GGACTTCTTACTAGAGCAC   | CCTCACAGAATTAAGAGTGC  | TGTTTCTTCTCTCTCC              | R           | T             | C             |

## Supplementary Table S1 Sequenom MassARRAY assay designs of association and AIM SNPs

|         |            |                      |                      |                        |   |   |   |
|---------|------------|----------------------|----------------------|------------------------|---|---|---|
| Assay_3 | rs1434536  | CTTGAACATCGTCCTGCTTC | TGGGAGCTTCTGTCTTTG   | GGTTCAGACCTCACCT       | R | G | A |
| Assay_3 | rs11097457 | TGCTCTTGTTGTAAGAGG   | AGATACAAGCCATCTGCACG | gggACATGTCAACAAAGATAGG | F | A | G |

### Notes

- \* Assays 1 and 2 derived from In4 markers of Kosoy, et al, Assay 3 SNP for association testing
- + rs9855638 replaced In<sub>4</sub> SNP rs6548616 with  $r^2 > 0.9$  in 3 HapMap populations
- ‡ ACGTTGGATG mass tags were appended to each PCR primer
- § lower case nucleotides in extension primer are non-complementary to amplified region

# Supplemental Figure 1

HapMap Samples  
(n=270)

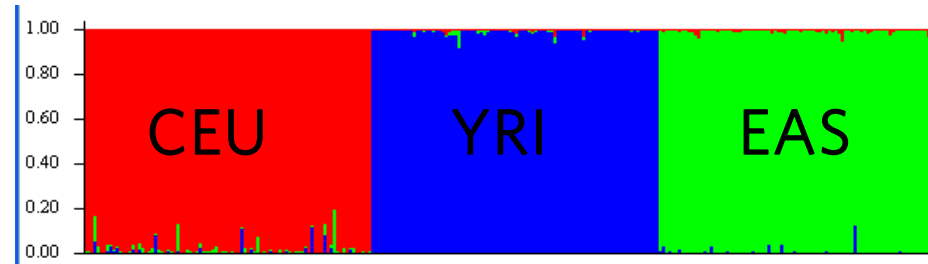

ECOG BrCa  
Cases (n=455)

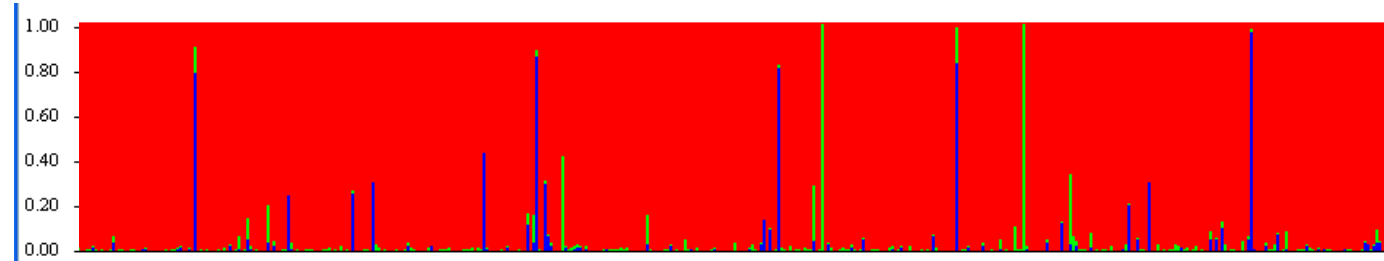

CGEMS Controls  
(~450 shown)

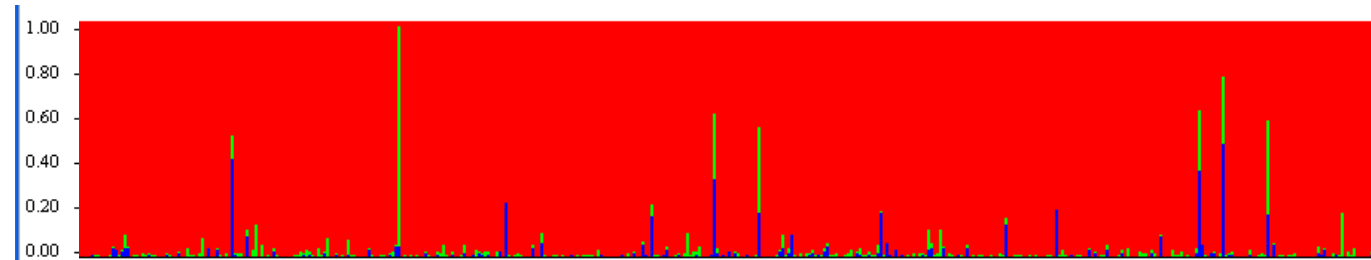

| Patient Sample Set | Number Patients | >80% YRI membership | >80% EAS membership | >90% CEU membership |
|--------------------|-----------------|---------------------|---------------------|---------------------|
| CGEMS Controls     | 1142            | 0                   | 9                   | 1064 (0.932)        |
| ECOG BrCa Cases    | 455             | 4                   | 2                   | 428 (0.941)         |

Supplementary Table 2  
SNPs Mapping to miRNA Sites

| SNP_ID     | miRNA recogniton<br>site | chrom | SNP_Pos*  | Motif_Chrom:position      | genelist†         |
|------------|--------------------------|-------|-----------|---------------------------|-------------------|
| rs10157828 | GCAGCCA                  | chr1  | 17267200  | chr1:17267200-17267206    | ER- overexpressed |
| rs4366378  | GGCCAGT                  | chr1  | 208914363 | chr1:208914359-208914365  | ER+ overexpressed |
| rs6565     | AACCATA                  | chr1  | 28085744  | chr1:28085739-28085745    | ER- overexpressed |
| rs6619     | TTGGGAG                  | chr1  | 37803283  | chr1:37803283-37803289    | ER+ overexpressed |
| rs1058240  | CCGTTGA                  | chr10 | 8156604   | chr10:8156602-8156608     | ER+ overexpressed |
| rs11191382 | AATGGGT                  | chr10 | 104488596 | chr10:104488593-104488599 | ER+ overexpressed |
| rs1334891  | CCAGGTT                  | chr10 | 99070861  | chr10:99070857-99070863   | ER+ overexpressed |
| rs7074516  | GTGTGAG                  | chr10 | 98344914  | chr10:98344912-98344918   | ER- overexpressed |
| rs7922412  | CAAGGGA                  | chr10 | 124805384 | chr10:124805379-124805385 | ER+ overexpressed |
| rs10279    | GTATTAT                  | chr11 | 8925885   | chr11:8925881-8925887     | ER+ overexpressed |
| rs1056562  | AAGGGAT                  | chr11 | 117630835 | chr11:117630830-117630836 | ER- overexpressed |
| rs10790248 | ACACTAC                  | chr11 | 117630882 | chr11:117630877-117630883 | ER- overexpressed |
| rs12288903 | AAGTCCA                  | chr11 | 45860170  | chr11:45860164-45860170   | ER+ overexpressed |
| rs3741325  | GTGCCAT                  | chr11 | 117911199 | chr11:117911194-117911200 | ER+ overexpressed |
| rs3741360  | TCCAGAG                  | chr11 | 66056924  | chr11:66056919-66056925   | ER+ overexpressed |
| rs8432     | AGCTGCT                  | chr11 | 66056091  | chr11:66056091-66056097   | ER+ overexpressed |
| rs8995     | CCACCCC                  | chr11 | 63351648  | chr11:63351645-63351651   | ER- overexpressed |
| rs2857672  | CACCAGC                  | chr12 | 50994544  | chr12:50994544-50994550   | ER- overexpressed |
| rs859147   | CTCTATG                  | chr12 | 25152535  | chr12:25152535-25152541   | ER+ overexpressed |
| rs1327179  | ATACTGT                  | chr13 | 20626320  | chr13:20626318-20626324   | ER- overexpressed |
| rs403904   | AAGGCAT                  | chr13 | 35144233  | chr13:35144228-35144234   | ER+ overexpressed |
| rs1565970  | AGTCTTA                  | chr14 | 51967826  | chr14:51967824-51967830   | ER+ overexpressed |
| rs10468050 | AGGCACT                  | chr15 | 69860993  | chr15:69860990-69860996   | ER+ overexpressed |
| rs16956198 | CTGTTGA                  | chr15 | 69858995  | chr15:69858992-69858998   | ER+ overexpressed |
| rs17811309 | AAAGGGA                  | chr15 | 69860243  | chr15:69860239-69860245   | ER+ overexpressed |
| rs2072692  | GGGATGC                  | chr15 | 87816037  | chr15:87816035-87816041   | ER- overexpressed |
| rs30122    | CATTAAC                  | chr16 | 14266734  | chr16:14266731-14266737   | ER+ overexpressed |
| rs30126    | GAGACGG                  | chr16 | 14263266  | chr16:14263262-14263268   | ER+ overexpressed |
| rs1051443  | TTAGCTC                  | chr17 | 6294757   | chr17:6294751-6294757     | ER- overexpressed |
| rs7687     | TTCCCCC                  | chr17 | 41459142  | chr17:41459141-41459147   | ER+ overexpressed |
| rs1046294  | ACAACCT                  | chr19 | 40352386  | chr19:40352380-40352386   | ER- overexpressed |
| rs12427    | GCTGGAG                  | chr19 | 48962659  | chr19:48962655-48962661   | ER- overexpressed |
| rs12891    | GAGCCAG                  | chr19 | 8233196   | chr19:8233196-8233202     | ER+ overexpressed |
| rs7257398  | AAGCACA                  | chr19 | 59433680  | chr19:59433674-59433680   | ER- overexpressed |
| rs2287086  | GTGCAA                   | chr2  | 60539999  | chr2:60539993-60539999    | ER- overexpressed |
| rs6729137  | AATGCAT                  | chr2  | 5757912   | chr2:5757907-5757913      | ER- overexpressed |
| rs6737419  | GTGCAA                   | chr2  | 3570576   | chr2:3570570-3570576      | ER- overexpressed |
| rs873033   | TCTAGAG                  | chr2  | 85390883  | chr2:85390879-85390885    | ER- overexpressed |
| rs1048055  | GTGCCAT                  | chr20 | 1558062   | chr20:1558057-1558063     | ER- overexpressed |
| rs2281807  | GAGCCAG                  | chr20 | 1558201   | chr20:1558195-1558201     | ER- overexpressed |
| rs6043374  | GTAACC                   | chr20 | 1557952   | chr20:1557946-1557952     | ER- overexpressed |
| rs6091230  | ACTGCAG                  | chr20 | 48926602  | chr20:48926602-48926608   | ER+ overexpressed |
| rs2834602  | TTACTAG                  | chr21 | 35012300  | chr21:35012294-35012300   | ER+ overexpressed |
| rs12172608 | AGGTGCA                  | chr22 | 45137237  | chr22:45137236-45137242   | ER+ overexpressed |
| rs6007891  | CAGTTTT                  | chr22 | 45135497  | chr22:45135493-45135499   | ER+ overexpressed |



Supplementary Table 2  
SNPs Mapping to miRNA Sites

|            |         |      |           |                          |                   |
|------------|---------|------|-----------|--------------------------|-------------------|
| rs495702   | CACTTCA | chr3 | 173598334 | chr3:173598328-173598334 | ER- overexpressed |
| rs1046322  | GAGTGAC | chr4 | 6355349   | chr4:6355347-6355353     | ER+ overexpressed |
| rs1434536  | CTCAGGG | chr4 | 96294988  | chr4:96294988-96294994   | ER+ overexpressed |
| rs1141538  | ATGCTGC | chr5 | 137303098 | chr5:137303092-137303098 | ER+ overexpressed |
| rs1438688  | CCCCGCC | chr5 | 148619255 | chr5:148619255-148619261 | ER+ overexpressed |
| rs1062577  | ATTCTTT | chr6 | 152465598 | chr6:152465594-152465600 | ER+ overexpressed |
| rs1225737  | TGCCTTA | chr6 | 11090638  | chr6:11090633-11090639   | ER+ overexpressed |
| rs508477   | GGTGTGT | chr6 | 13472323  | chr6:13472320-13472326   | ER- overexpressed |
| rs7756717  | CTGAGCC | chr6 | 11090925  | chr6:11090921-11090927   | ER+ overexpressed |
| rs8523     | ATTTCTC | chr6 | 11089039  | chr6:11089037-11089043   | ER+ overexpressed |
| rs9341070  | ACACTCC | chr6 | 152461890 | chr6:152461884-152461890 | ER+ overexpressed |
| rs9341074  | AATGGGT | chr6 | 152464148 | chr6:152464142-152464148 | ER+ overexpressed |
| rs10263074 | TTTATCT | chr7 | 87375999  | chr7:87375994-87376000   | ER- overexpressed |
| rs6616     | ATTTCTC | chr7 | 16790503  | chr7:16790502-16790508   | ER+ overexpressed |
| rs4986994  | AACTGAC | chr8 | 18124767  | chr8:18124761-18124767   | ER+ overexpressed |
| rs12710570 | GTGCAAT | chrX | 115506264 | chrX:115506260-115506266 | ER- overexpressed |
| rs6567569  | TGCAGAA | chrX | 3534309   | chrX:3534306-3534312     | ER- overexpressed |
| rs741500   | TGTTACT | chrX | 10377020  | chrX:10377016-10377022   | ER- overexpressed |

\* UCSC Build 36 coordinates

† Defined in Smith, et al BMC Bioinformatics 9:63,2008

Supplementary Table S3-Original CGEMS Association Findings

| SNP       | CGEMS cases (n=1145) |       |      |       | CGEMS controls (n=1142) |      |       | CGEMS |           |          |       |
|-----------|----------------------|-------|------|-------|-------------------------|------|-------|-------|-----------|----------|-------|
|           | GT                   | Count | Prop | HWE   | Count                   | Prop | HWE   | OR    | 95% C.I.  | P-value* | Rank† |
| rs1219648 | A/A                  | 351   | 0.31 | 0.152 | 432                     | 0.38 | 0.851 | 1.00  |           | 8.0E-06  | 2     |
| Het       | A/G                  | 542   | 0.47 |       | 534                     | 0.47 |       | 1.25  | 1.04-1.50 |          |       |
| Minor     | G/G                  | 249   | 0.22 |       | 169                     | 0.15 |       | 1.81  | 1.42-2.04 |          |       |
| rs1970801 | G/G                  | 165   | 0.15 | 0.950 | 215                     | 0.30 | 0.337 | 1.00  |           | 1.7E-04  | 79    |
| Het       | T/G                  | 534   | 0.47 |       | 577                     | 0.51 |       | 1.21  | 0.95-1.52 |          |       |
| Major     | T/T                  | 436   | 0.38 |       | 344                     | 0.19 |       | 1.65  | 1.29-2.11 |          |       |
| rs6831418 | C/C                  | 250   | 0.22 | 0.005 | 374                     | 0.33 | 0.028 | 1.0   |           | 1.2E-04  | 52    |
| Het       | C/T                  | 515   | 0.45 |       | 588                     | 0.52 |       | 0.88  | 0.73-1.06 |          |       |
| Minor     | T/T                  | 373   | 0.33 |       | 175                     | 0.15 |       | 1.43  | 1.13-1.82 |          |       |

\*Unadjusted P-value from the score test with df=2 in Logistic regression from original CGEMS GWAS

†Rank of the SNPs from original CGEMS GWAS, for rs1970801, test was for minor allele G
